# Supplementary material for: Climate-Resilient Sanitary Sewers through Minimized Inflow
Source: Atypon-hosted journal article supplement (doi:10.1061/jwrmd5.wreng-6411), 2024-08-16
Supplement: supplemental materials_jwrmd5.wreng-6411_marega.pdf [file supplemental%20materials_jwrmd5.wreng-6411_marega.pdf]

## SUPPLEMENTAL MATERIALS

*ASCE Journal of Water Resources Planning and Management*

# Climate-Resilient Sanitary Sewers through Minimized Inflow

Gabrielle Marega, Jennifer Drake, and David D. Meyer

**DOI:** 10.1061/JWRMD5.WRENG-6411

© ASCE 2024

[www.ascelibrary.org](http://www.ascelibrary.org)

## **S.1. Application**

### **S.1.1. Design Guidelines Considerations**

We reviewed three design codes and guidelines to construct the sanitary sewer model: Brazil (ABNT 1986), South Africa (Department of Human Settlements 2019) and Toronto (Qazi 2021). Two of them, Brazil and South Africa, are country-level documents. However, the third one, Toronto (Canada), is a city-level guideline. Brazil has two different design codes, one for the collection network design and another only for interceptors' pipes. This study only analyzed the guideline for designing the sanitary sewer collection network.

In all three guidelines, the sanitary sewage flow is a function of the projected population at the end of the infrastructure lifetime,  $g(T)$ , and the peak sewage production,  $S_{p,p}$ . The peak sewage production is the average sewage production per capita,  $S_p$ , magnified by a peak factor,  $p_f$ . The peak factor,  $p_f$ , is a fixed value in Brazil and South Africa guidelines. However, in Toronto's guideline, the peak factor is a function of the final population calculated using the Harmon equation to estimate the peak flow to average flow (see Table S1).

The approach for considering inflow and infiltration is different in each guideline. Brazilian guideline for collector sewers does not mention the contribution of stormwater inflow; the groundwater infiltration is the product of the total upstream length of the network and an infiltration load,  $\mu$  (ABNT 1986). South Africa considers inflow and infiltration separately (Department of Human Settlements 2019). The stormwater inflow is a percentage of the pipe's total required capacity when flowing full. The groundwater infiltration flow is estimated as the product of the total upstream pipe's lengths, the designed pipe diameter, and an infiltration load,  $\mu$ . For Toronto, inflow and infiltration are considered together: the infiltration and inflow combined flow rate is a function of the upstream area served by the sewer (Qazi 2021). See Table S1 for each guideline's infiltration load,  $\mu$ .

To understand the influence of our use of three guidelines instead of only Brazil's we repeated our analysis using only Brazil's guidelines. The result is shown in Fig. S1.

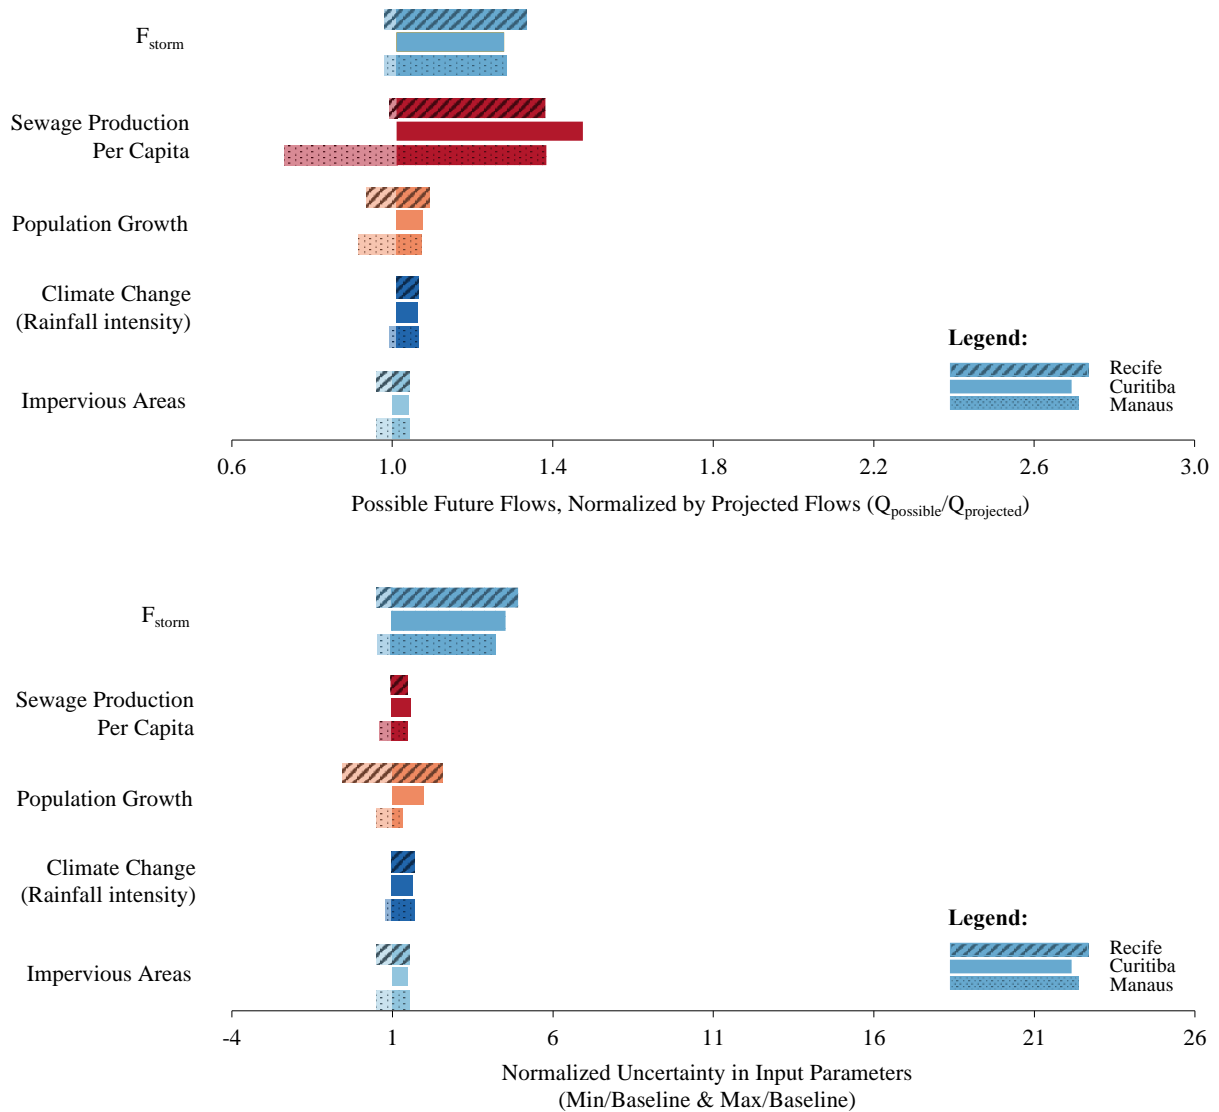

Fig. S1. The effects of uncertain input parameters on possible future flows using only Brazilian guidelines to calculate the min-max range of potential  $F_{storm-projected}$ . Similar to Fig. 3 in the main text: (a) One-way sensitivity analysis depicts the range of possible future flows that would result if each input parameter took on its maximum or minimum, normalized by the projected flows in the baseline case for Curitiba (top), Manaus (middle), and Recife (bottom) in 2050; (b) normalized uncertainty in each input parameter, normalized by the baseline estimate for Curitiba (top), Manaus (middle), and Recife (bottom). Darker colours (right) correspond to the upper bound (maximum value), and lighter colours to the lower bound (minimum value). Shades of blue correspond to the uncertainties that impact the inflow, and shades of red are the uncertainties that affect the sewage flow (Eq. 1 in the main text).

**Table S1.** Summary of main differences from the three design guidelines reviewed.

|                                                        | <b>Brazil</b>                                      | <b>South Africa</b>                                                                    | <b>Toronto</b>                                                                                |
|--------------------------------------------------------|----------------------------------------------------|----------------------------------------------------------------------------------------|-----------------------------------------------------------------------------------------------|
| <b>Peak Factor<br/>(<math>p_f</math>)</b>              | 1.8                                                | 1.8 – 2.5                                                                              | Using Harmon's formula for<br>the peak factor<br>$1 + \frac{14}{4 + \sqrt{\frac{P^*}{1000}}}$ |
| <b>Infiltration coefficient<br/>(<math>\mu</math>)</b> | 0.05 - 1<br>[L.s <sup>-1</sup> .km <sup>-1</sup> ] | 0.03 - 0.04<br>[L.min <sup>-1</sup> .m pipe <sup>-1</sup> . m diameter <sup>-1</sup> ] | 0.26                                                                                          |
| <b>Inflow<br/>(<math>Q_{inflow}</math>)</b>            | Not mentioned                                      | 30% of the flow of the total full<br>capacity                                          | [L.s <sup>-1</sup> .gross ha <sup>-1</sup> ]                                                  |
| <b>Spare Capacity<br/>(<math>r</math>)</b>             | 0.08                                               | 0.3                                                                                    | 0.2                                                                                           |

\* where P is the final population served by the network

### S.1.2. Parameters estimation

**Table S2.** Intensity-Duration-Frequency (IDF) curve for Recife, Curitiba, Manaus

|                 | IDF                                              | Rainfall intensity <sup>1</sup><br>(Baseline) | Reference                   |
|-----------------|--------------------------------------------------|-----------------------------------------------|-----------------------------|
| <b>Recife</b>   | $\frac{1423.97 T_r^{0.1124}}{(t + 21^{0.7721})}$ | 88                                            | (Weschenfelder et al. 2014) |
| <b>Curitiba</b> | $\frac{3221.07 T_r^{0.258}}{(t + 26^{1.01})}$    | 81                                            | (Fendrich 1989)             |
| <b>Manaus</b>   | $\frac{1102.28 T_r^{0.115}}{(t + 9.8^{0.724})}$  | 102                                           | (Monteiro and Braga 2018)   |

<sup>1</sup> Using a Return Period ( $T_r$ ) of 2 years, and the duration (t) of 20 min.

**Table S3.** Justification of ranges of values for the five uncertainties considered for Recife

|                                                                             | <b>Min. value<br/>(% Change<br/>from baseline)</b> | <b>Baseline<br/>Projections</b> | <b>Max. value<br/>(% Change<br/>from baseline)</b> | <b>Justification and Reference</b>                                                                                                                                                                                                                                                               |
|-----------------------------------------------------------------------------|----------------------------------------------------|---------------------------------|----------------------------------------------------|--------------------------------------------------------------------------------------------------------------------------------------------------------------------------------------------------------------------------------------------------------------------------------------------------|
| <b>Sewage<br/>production per<br/>capita<br/>(L.capita<sup>-1</sup>.day)</b> | 80                                                 | 82                              | 122                                                | SNIS: Brazilian's National Sanitation Information System (SNIS 2023) for water consumption. Return rate = 0.8 as recommended by Brazilian guidelines (ABNT 1986)<br><i>Baseline:</i> IBGE (IBGE 2023).                                                                                           |
| <b>Total Population<br/>Growth rate (%)</b>                                 | - 4                                                | + 7                             | + 18                                               | <i>Minimum and Maximum value:</i> United Nation's World Population Prospects 2019 (United Nations 2019).                                                                                                                                                                                         |
| <b>F<sub>storm</sub><br/>(%)</b>                                            | 0.005                                              | 0.009                           | 0.21                                               | Assumption using different design guidelines (Figure 2a)                                                                                                                                                                                                                                         |
| <b>Impervious<br/>areas<br/>(-)</b>                                         | 0.3                                                | 0.6                             | 0.9                                                | Authors' assumption<br><br><i>Baseline:</i> Using the city's IDF (Assuming a $t_c = 23.2$ min and a return period of 2 years; Weschenfelder et al. 2014). <i>Minimum value:</i> assuming a possible decrease of -20% in 2050. <i>Maximum value:</i> assuming a possible increase of 68% in 2050. |
| <b>Climate change<br/>(mm.h<sup>-1</sup>)</b>                               | 88                                                 | 88                              | 148                                                |                                                                                                                                                                                                                                                                                                  |

**Table S4.** Justification of ranges of values for the five uncertainties considered for Curitiba

|                                                                             | <b>Min. value<br/>(% Change<br/>from baseline)</b> | <b>Baseline<br/>Projections</b> | <b>Max. value<br/>(% Change<br/>from baseline)</b> | <b>Justification and Reference</b>                                                                                                                                                                                                                          |
|-----------------------------------------------------------------------------|----------------------------------------------------|---------------------------------|----------------------------------------------------|-------------------------------------------------------------------------------------------------------------------------------------------------------------------------------------------------------------------------------------------------------------|
| <b>Sewage<br/>production per<br/>capita<br/>(L.capita<sup>-1</sup>.day)</b> | 77                                                 | 108                             | 172                                                | SNIS: Brazilian's National Sanitation Information System (SNIS 2023) for water consumption. Return rate = 0.8 as recommended by Brazilian guidelines (ABNT 1986).<br><i>Baseline:</i> IBGE (IBGE 2023).                                                     |
| <b>Total Population<br/>Growth rate (%)</b>                                 | - 4                                                | + 9                             | + 18                                               | <i>Minimum and Maximum value:</i> United Nation's World Population Prospects 2019 (United Nations 2019).                                                                                                                                                    |
| <b>F<sub>storm</sub><br/>(%)</b>                                            | 0.008                                              | 0.012                           | 0.26                                               | Assumption using different design guidelines (Figure 2b)                                                                                                                                                                                                    |
| <b>Impervious<br/>areas<br/>(-)</b>                                         | 0.3                                                | 0.6                             | 0.9                                                | Authors' assumption                                                                                                                                                                                                                                         |
| <b>Climate change<br/>(mm.h<sup>-1</sup>)</b>                               | 65                                                 | 81                              | 136                                                | <i>Baseline:</i> Using the city's IDF (Assuming a $t_c = 23.2$ min and a return period of 2 years; Fendrich 1989)<br><i>Minimum value:</i> assuming a possible decrease of -20% in 2050. <i>Maximum value:</i> assuming a possible increase of 68% in 2050. |



**Table S5.** Justification of ranges of values for the five uncertainties considered for Manaus

|                                                                             | <b>Min. value<br/>(% Change<br/>from baseline)</b> | <b>Baseline<br/>Projections</b> | <b>Max. value<br/>(% Change<br/>from baseline)</b> | <b>Justification and Reference</b>                                                                                                                                                                                                                                                             |
|-----------------------------------------------------------------------------|----------------------------------------------------|---------------------------------|----------------------------------------------------|------------------------------------------------------------------------------------------------------------------------------------------------------------------------------------------------------------------------------------------------------------------------------------------------|
| <b>Sewage<br/>production per<br/>capita<br/>(L.capita<sup>-1</sup>.day)</b> | 56                                                 | 87                              | 128                                                | SNIS: Brazilian's National Sanitation Information System for water consumption (SNIS 2023). Return rate = 0.8 as recommended by Brazilian guidelines (ABNT 1986).<br><i>Baseline:</i> IBGE (IBGE 2023).                                                                                        |
| <b>Total Population<br/>Growth rate (%)</b>                                 | + 17                                               | + 33                            | + 43                                               | <i>Minimum and Maximum value:</i> United Nation's World Population Prospects 2019 (United Nations 2019).                                                                                                                                                                                       |
| <b>F<sub>storm</sub><br/>(%)</b>                                            | 0.006                                              | 0.010                           | 0.20                                               | Assumption using different design guidelines (Figure 2c)                                                                                                                                                                                                                                       |
| <b>Impervious<br/>areas<br/>(-)</b>                                         | 0.3                                                | 0.6                             | 0.9                                                | Authors' assumption<br><br><i>Baseline:</i> Using the city's IDF (Assuming a $t_c = 23.2$ min and a return period of 2 years; Monteiro and Braga 2018). <i>Minimum value:</i> assuming a possible decrease of -20% in 2050. <i>Maximum value:</i> assuming a possible increase of 68% in 2050. |
| <b>Climate change<br/>(mm.h<sup>-1</sup>)</b>                               | 82                                                 | 102                             | 171                                                |                                                                                                                                                                                                                                                                                                |

### S.1.3. Temporal Uncertainty

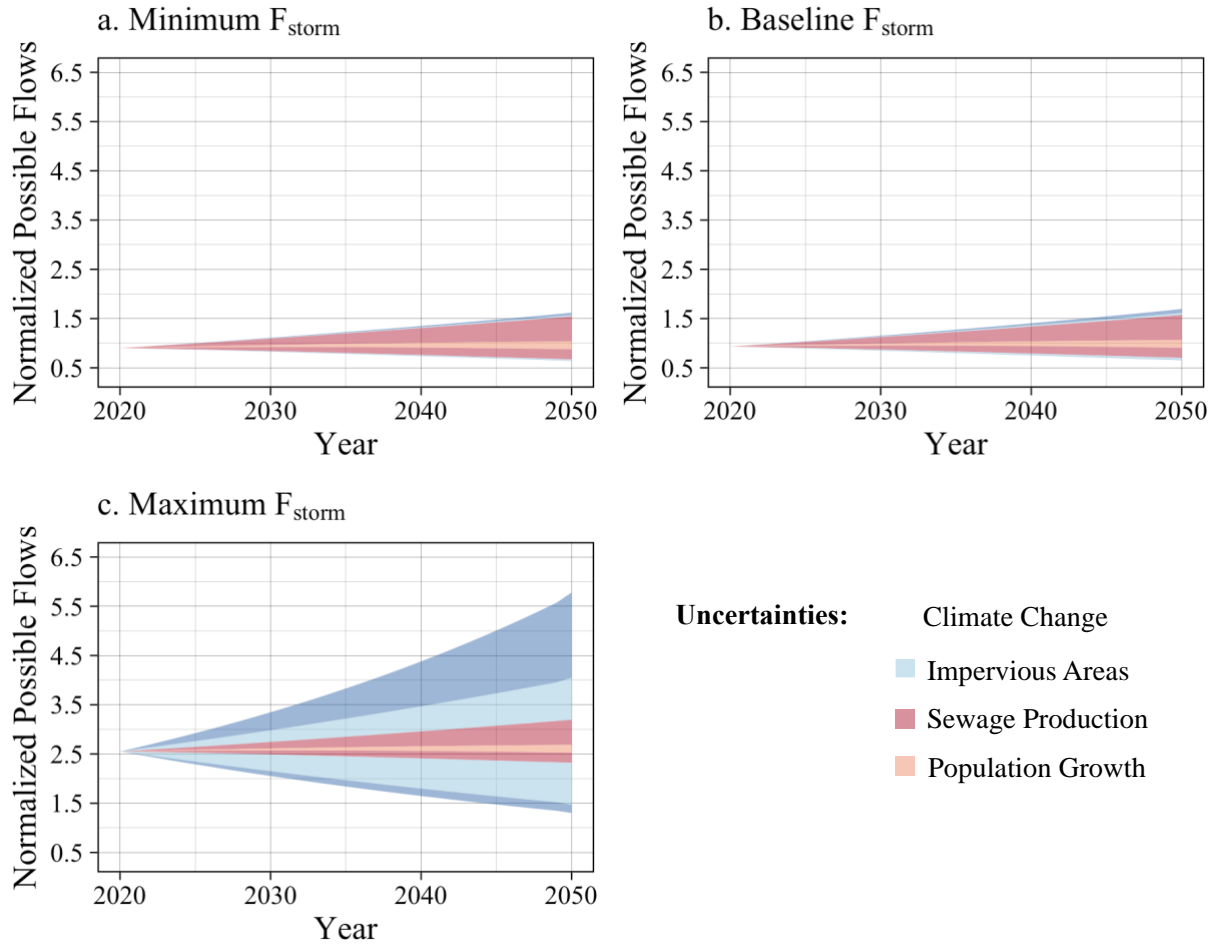

**Fig. S2.** The value of  $F_{\text{storm}}$  mediates the effects of other uncertainties over time. For the minimum (a), baseline (b), and maximum (c) possible values of  $F_{\text{storm}}$ , the results of a one-way sensitivity analysis in each year are superimposed. Uncertainties are shaded: population growth (light orange), sewage production (darker red), impervious areas (light blue) and climate change (dark blue). The time evolution is shown for Curitiba (from 2020- 2050).

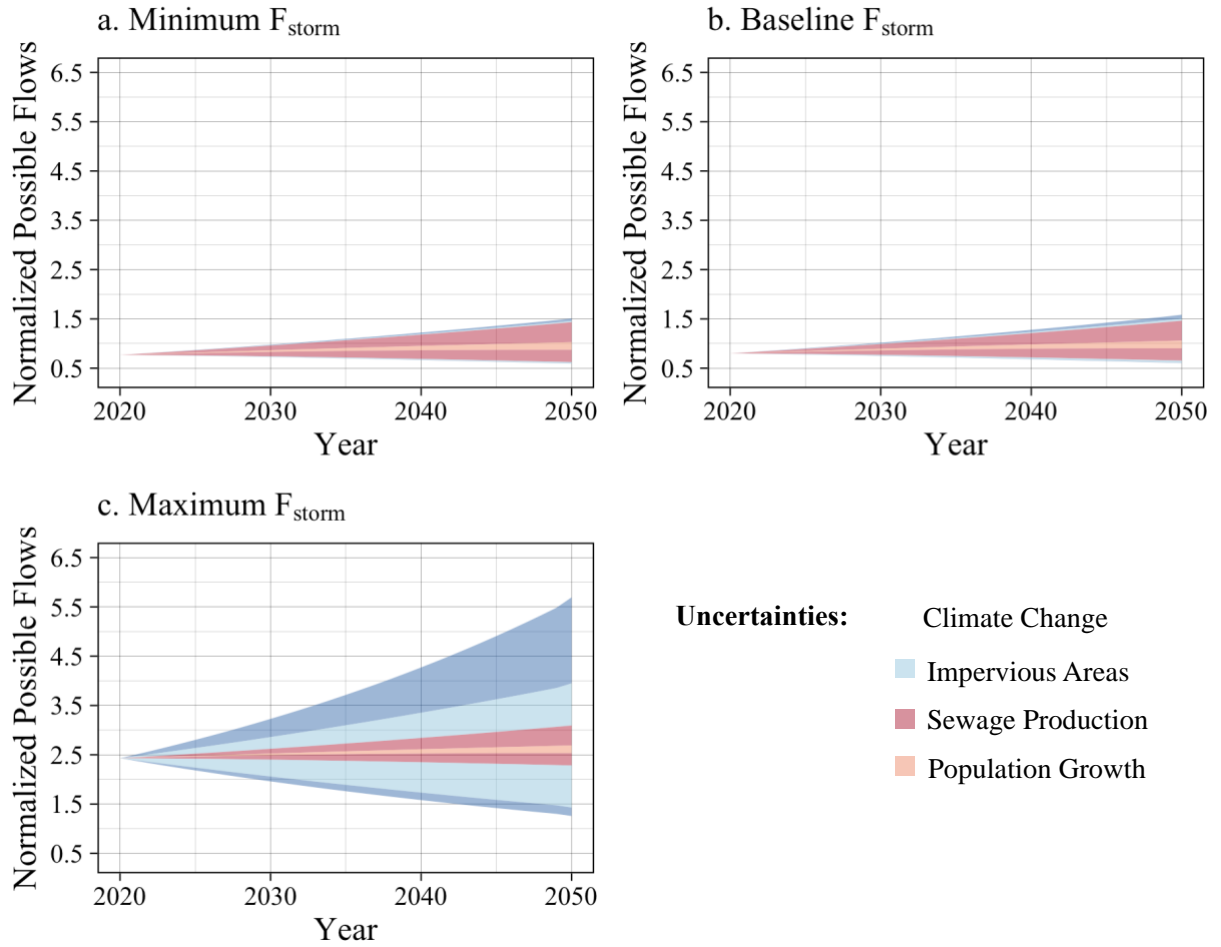

**Fig. S3.** The value of  $F_{\text{storm}}$  mediates the effects of other uncertainties over time. For the minimum (a), baseline (b), and maximum (c) possible values of  $F_{\text{storm}}$ , the results of a one-way sensitivity analysis in each year are superimposed. Uncertainties are shaded: population growth (light orange), sewage production (darker red), impervious areas (light blue) and climate change (dark blue). The time evolution is shown for Manaus (from 2020- 2050).

## References

- ABNT. 1986. NBR 9649 Projeto de Redes Coletoras de Esgoto Sanitário [Sanitary Sewage Collection Networks Project Design Guideline] [In Portuguese]. Rio de Janeiro, Brazil: Associação Brasileira de Normas Técnicas.
- Department of Human Settlements. 2019. Section K: Sanitation on The Neighbourhood Planning and Design Guide. South African Government.
- Fendrich, R. 1989. Chuvas intensas na estação pluviográfica Curitiba. Prado Velho (PUC-PR) [Intense rains at the Curitiba rain gauge Prado Velho (PUC-PR)] [In Portuguese]. Curitiba, Brazil: ISAM/PUC-PR.
- IBGE. 2023. “Projeção Populacional Brasileira [Brazilian Population Projection] [In Portuguese].” Accessed September 19, 2023. <https://cidades.ibge.gov.br/brasil/panorama>.
- Monteiro, M. M., and E. M. Braga. 2018. “Análise da Equação IDF de Manaus. [Analysis of the Manaus IDF Equation] [In Portuguese].” An. Semin. Int. Ciênc. Ambiente E Sustentabilidade Na Amaz.
- Qazi, G. 2021. Design Criteria for Sewers and Watermains. Toronto, Canada.
- SNIS. 2023. “Sistema Nacional de Saneamento Básico [National Sanitation Information System][In Portuguese].”
- United Nations. 2019. Probabilistic Population Projections Rev. 1 based on the World Population Prospects 2019. Department of Economic and Social Affairs, Population Division.
- Weschenfelder, A. B., K. Pickbrenner, and J. A. Pinto. 2014. Atlas Pluviométrico do Brasil; Equações Intensidade-Duração-Frequência. Município: Recife. Estação Pluviográfica: Aeroporto de Recife Código 82899. Porto Alegre: CPRM, Brazil.
